# Supplementary material for: Long-Term Persistence of Mitochondrial DNA Instability in HIV-Exposed Uninfected Children during and after Exposure to Antiretroviral Drugs and HIV
Source: MDPI journal article supplement (doi:10.3390/biomedicines10081786), 2022-07-25
Supplement: s1 [file s1]

## Supplementary tables

**Table S1.** Comparison of randomly selected children from Burkina Faso and Zambia that were not included in the analysis (n=87) and those that were (n=24) .

| Characteristics                                  | Included<br>(n=24) | Not included<br>(n=87) | p-value |
|--------------------------------------------------|--------------------|------------------------|---------|
| <b>Socio-demographics</b>                        |                    |                        |         |
| Site; n (%)                                      |                    |                        | 0.930   |
| Burkina Faso                                     | 13 (54.2)          | 48 (55.2)              |         |
| Zambia                                           | 11 (45.8)          | 39 (44.8)              |         |
| Sex; n (%)                                       |                    |                        | 0.727   |
| Boy                                              | 12 (50.0)          | 47 (54.0)              |         |
| <b>Anthropometrics; mean <math>\pm</math> SD</b> |                    |                        |         |
| Weight (kg)                                      | 3.1 $\pm$ 0.4      | 3.1 $\pm$ 0.4          | 0.793   |
| Height (cm)                                      | 49.0 $\pm$ 2.2     | 49.1 $\pm$ 1.7         | 0.763   |
| WAZ                                              | -0.7 $\pm$ 0.9     | -0.7 $\pm$ 0.9         | 0.828   |
| HAZ                                              | -0.9 $\pm$ 1.1     | -0.9 $\pm$ 0.9         | 0.812   |
| WHZ                                              | -0.4 $\pm$ 1.5     | -0.3 $\pm$ 1.0         | 0.789   |
| Gestational age (week); median [IQR]             | 38 [37-39.5]       | 38 [36-39]             | 0.454   |
| Preterm birth (week); n (%)                      |                    |                        |         |
| No prematurity $\geq$ 37                         | 21 (87.5)          | 61 (70.1)              | 0.116*  |
| <b>Hematology; n (%)</b>                         |                    |                        |         |
| Hemoglobin concentration (g/dL); n (%)           |                    |                        | 1.000*  |
| Normal                                           | 22 (91.7)          | 80 (92.0)              |         |
| Anemia                                           | 2 (8.3)            | 7 (8.0)                |         |
| Platelet count ( $10^3/\text{mm}^3$ ); n (%)     |                    |                        | 1.000*  |
| Normal $>125$                                    | 24 (100.0)         | 86 (99.0)              |         |
| Leucocyte count ( $10^3/\text{mm}^3$ ); n (%)    |                    |                        | N.A.    |
| Normal $>2.5$                                    | 24 (100.0)         | 87 (100.0)             |         |
| Neutrophil count ( $10^3/\text{mm}^3$ ); n (%)   |                    |                        | 0.578*  |
| Normal                                           | 23 (100.0)         | 83 (95.4)              |         |
| Neutropenia $^{\text{y}}$                        | 0 (0.0)            | 4 (4.6)                |         |
| <b>Biochemistry; n (%)</b>                       |                    |                        |         |
| ALT concentration (U/L)                          |                    |                        | 0.337*  |
| Normal $< 1.25 \times \text{ULN}$                | 24 (100.0)         | 81 (93.1)              |         |
| Abnormal $\geq 1.25 \times \text{ULN}$           | 0 (0.0)            | 6 (6.9)                |         |
| <b>Mother's characteristics</b>                  |                    |                        |         |
| Age (year); mean $\pm$ SD                        | 28.2 $\pm$ 5.6     | 28.5 $\pm$ 5.2         | 0.811   |
| Parity; median [IQR]                             | 3 [2-4]            | 3 [1.5-3]              | 0.387   |
| Mother/caregiver ever attended school; n (%)     |                    |                        |         |
| Yes                                              | 18 (75.0)          | 61 (70.1)              | 0.640   |
| BMI; mean $\pm$ SD                               | 23.3 $\pm$ 2.8     | 23.9 $\pm$ 4.0         | 0.479   |
| HIV viral load; n (%)                            |                    |                        | 0.566   |
| $\leq 1000$ copies/mL                            | 14 (58.3)          | 45 (51.7)              |         |
| $>1000$ copies/mL                                | 10 (41.7)          | 42 (48.3)              |         |
| ARV regimen; n (%)                               |                    |                        | 1.000*  |
| containing AZT                                   | 24 (100.0)         | 85 (97.7)              |         |
| Duration of ARV prophylaxis (week); median [IQR] | 8 [4-9]            | 8 [5-11]               | 0.088   |
| Smoking during pregnancy; n (%) $^{\text{t}}$    |                    |                        | N.A.    |
| No                                               | 24 (100.0)         | 56 (100.0)             |         |

Alcohol consumption during pregnancy; *n (%)*<sup>†</sup>

0.013

Yes 12 (54.6) 14 (25.0)

\*p-value obtained from Fischer's exact test; <sup>†</sup>Variables from PROMISE M&S (Y6), 21 missing values. Abbreviations: SD, standard deviation; kg, kilogram; cm, centimetres; WAZ, weight-for-age Z-score; HAZ, height-for-age Z-score; IQR, interquartile range; ALT, alanine transaminase; BMI, body mass index; HIV, human immunodeficiency virus; mL, millilitres; ARV, antiretroviral.

**Table S2.** List of mtDNA alterations.

| Participant Id | Time point | Alteration event | 5' breakpoint | 3' breakpoint | heteroplasmy (%) | Flanking repeat at break                       |
|----------------|------------|------------------|---------------|---------------|------------------|------------------------------------------------|
| #1             | D7         | Del              | 6516          | 4201          | 0,96             | 6517-GCAT-6520 <> 4201-GCAT-4204               |
| #1             | D7         | Del              | 6843          | 4057          | 1,88             | 6844-TCCCC-6848 <> 4057-TCCCC-4061             |
| #1             | D7         | Del              | 7034          | 14400         | 1,78             | 7035-CACT-7038 <> 14400-CACT-14403             |
| #1             | D7         | Del              | 15024         | 4830          | 0,13             | none                                           |
| #1             | W50        | Del              | 7318          | 11257         | 0,12             | none                                           |
| #1             | W50        | Del              | 9387          | 14783         | 5,51             | 9385-TG-9386 <> 14782-TG-14783                 |
| #1             | Y6         | Del              | 6333          | 15830         | 0,07             | 6334-A-6334 <> 15830-A-15830                   |
| #1             | Y6         | Del              | 8000          | 14573         | 0,06             | 8001-ACAATC-8006 <> 14573-ACAATC-14578         |
| #1             | Y6         | Del              | 8869          | 14844         | 0,55             | 8867-TA-8868 <> 14843-TA-14844                 |
| #1             | D7         | Dupl             | 4254          | 7122          | 0,13             | 4255-CAAACCTA-4262 <> 7122-CAAACCTA-7129       |
| #1             | D7         | Dupl             | 14857         | 6891          | 0,09             | none                                           |
| #2             | D7         | Del              | 7033          | 14400         | 0,10             | 7034-C-7034 <> 14400-C-14400                   |
| #2             | W50        | Del              | 6485          | 3553          | 2,37             | 6486-CTTCT-6490 <> 3553-CTTCT-3557             |
| #2             | W50        | Del              | 7034          | 14400         | 0,15             | 7035-CACT-7038 <> 14400-CACT-14403             |
| #2             | W50        | Del              | 7318          | 13373         | 4,53             | 7319-T-7319 <> 13373-T-13373                   |
| #2             | W50        | Del              | 7526          | 14710         | 0,50             | 7527-GAAAAACCAT-7536 <> 14710-GAAAAACCAT-14719 |
| #2             | Y6         | Del              | 1572          | 1605          | 0,17             | 1573-AGTGTA-1578 <> 1605-AGTGTA-1610           |
| #4             | W50        | Del              | 7707          | 15025         | 3,12             | 7708-CCT-7710 <> 15025-CCT-15027               |
| #4             | D7         | Dupl             | 15045         | 7017          | 4,61             | none                                           |
| #4             | W50        | Dupl             | 15045         | 7017          | 0,14             | none                                           |
| #5             | W50        | Del              | 7569          | 4049          | 0,16             | 7570-A-7570 <> 4049-A-4049                     |
| #5             | W50        | Del              | 15276         | 5313          | 0,20             | 15277-AT-15278 <> 5313-AT-5314                 |
| #5             | Y6         | Del              | 6430          | 3702          | 0,70             | 6428-AT-6429 <> 3701-AT-3702                   |
| #6             | D7         | Del              | 6923          | 3967          | 0,88             | 6924-GCCCTA-6929 <> 3967-GCCCTA-3972           |
| #6             | D7         | Del              | 7707          | 15025         | 1,88             | 7708-CCT-7710 <> 15025-CCT-15027               |
| #6             | W50        | Del              | 7034          | 14400         | 0,11             | 7035-CACT-7038 <> 14400-CACT-14403             |
| #6             | W50        | Dupl             | 14857         | 6891          | 0,06             | none                                           |

|     |     |      |       |       |       |                                              |
|-----|-----|------|-------|-------|-------|----------------------------------------------|
| #6  | Y6  | Del  | 8279  | 14641 | 0,21  | 8280-ACCC-8283 <> 14641-ACCC-14644           |
| #7  | D7  | Dupl | 14857 | 6891  | 0,12  | none                                         |
| #7  | D7  | Dupl | 15117 | 5942  | 11,06 | 15118-AG-15119 <> 5942-AG-5943               |
| #7  | D7  | Dupl | 15686 | 6570  | 5,24  | 15687-GC-15688 <> 6570-GC-6571               |
| #7  | W50 | Dupl | 15321 | 6476  | 0,07  | 15322-AGCA-15325 <> 6476-AGCA-6479           |
| #7  | D7  | Del  | 5956  | 4225  | 0,59  | 5957-ATACC-5961 <> 4225-ATACC-4229           |
| #7  | D7  | Del  | 7034  | 14400 | 0,32  | 7035-CACT-7038 <> 14400-CACT-14403           |
| #7  | D7  | Del  | 9418  | 14699 | 39,01 | none                                         |
| #7  | W50 | Del  | 7285  | 14225 | 0,08  | none                                         |
| #7  | W50 | Del  | 8257  | 14421 | 0,28  | none                                         |
| #7  | Y6  | Del  | 7515  | 14012 | 0,39  | 7516-AAAAG-7520 <> 14012-AAAAG-14016         |
| #8  | D7  | Del  | 7034  | 14400 | 0,26  | 7035-CACT-7038 <> 14400-CACT-14403           |
| #8  | D7  | Del  | 7091  | 3716  | 0,15  | none                                         |
| #8  | W50 | Del  | 7034  | 14400 | 0,06  | 7035-CACT-7038 <> 14400-CACT-14403           |
| #8  | W50 | Del  | 7114  | 13992 | 0,06  | 7115-CCTAGACC-7122 <> 13992-CCTAGACC-13999   |
| #8  | D7  | Dupl | 14857 | 6888  | 0,05  | 14858-GG-14859 <> 6888-GG-6889               |
| #9  | D7  | Dupl | 4992  | 14757 | 0,26  | 4993-TACGCAAAA-5001 <> 14757-TACGCAAAA-14765 |
| #9  | D7  | Del  | 7034  | 14400 | 0,16  | 7035-CACT-7038 <> 14400-CACT-14403           |
| #9  | Y6  | Del  | 7122  | 13096 | 0,20  | none                                         |
| #9  | Y6  | Del  | 9329  | 14827 | 0,10  | 9330-CTCC-9333 <> 14827-CTCC-14830           |
| #9  | Y6  | Dupl | 1621  | 6080  | 0,05  | 1617-ACAA-1620 <> 6077-ACAA-6080             |
| #9  | Y6  | Dupl | 14962 | 6755  | 0,47  | 14963-GT-14964 <> 6755-GT-6756               |
| #10 | D7  | Del  | 7919  | 14732 | 1,93  | 7920-ACTAC-7924 <> 14732-ACTAC-14736         |
| #10 | W50 | Del  | 7042  | 14953 | 0,32  | 7043-C-7043 <> 14953-C-14953                 |
| #10 | W50 | Del  | 7726  | 5135  | 0,10  | 7724-CA-7725 <> 5134-CA-5135                 |
| #10 | W50 | Del  | 7749  | 14400 | 0,10  | 7750-C-7750 <> 14400-C-14400                 |
| #10 | W50 | Del  | 15043 | 5135  | 1,27  | 15044-C-15044 <> 5135-C-5135                 |
| #10 | D7  | Dupl | 15052 | 7017  | 0,26  | 15053-TA-15054 <> 7017-TA-7018               |
| #10 | W50 | Dupl | 5198  | 7017  | 0,44  | 5197-A-5197 <> 7017-A-7017                   |
| #10 | W50 | Dupl | 15048 | 7017  | 6,99  | none                                         |
| #10 | W50 | Dupl | 15061 | 14050 | 0,53  | 15062-TC-15063 <> 14050-TC-14051             |
| #10 | W50 | Dupl | 15079 | 9312  | 0,32  | none                                         |
| #10 | Y6  | Dupl | 16095 | 7130  | 0,13  | none                                         |
| #11 | D7  | Dupl | 15827 | 6950  | 0,06  | 15828-C-15828 <> 6950-C-6950                 |
| #11 | W50 | Dupl | 14857 | 6891  | 0,08  | none                                         |
| #11 | W50 | Del  | 7034  | 14400 | 1,10  | 7035-CACT-7038 <> 14400-CACT-14403           |

|     |     |      |       |       |      |                                            |
|-----|-----|------|-------|-------|------|--------------------------------------------|
| #11 | Y6  | Del  | 7707  | 15025 | 0,63 | 7708-CCT-7710 <> 15025-CCT-15027           |
| #11 | Y6  | Del  | 7838  | 14933 | 2,53 | 7837-T-7837 <> 14933-T-14933               |
| #12 | W50 | Del  | 7032  | 14400 | 0,16 | 7030-CT-7031 <> 14399-CT-14400             |
| #12 | Y6  | Del  | 7144  | 14568 | 0,07 | 7145-C-7145 <> 14568-C-14568               |
| #12 | Y6  | Del  | 7770  | 14884 | 0,07 | none                                       |
| #12 | W50 | Dupl | 16028 | 7056  | 0,12 | none                                       |
| #13 | W50 | Del  | 10372 | 3537  | 0,65 | none                                       |
| #13 | Y6  | Del  | 6324  | 3692  | 0,13 | none                                       |
| #13 | Y6  | Del  | 6349  | 3273  | 0,46 | 6348-C-6348 <> 3273-C-3273                 |
| #13 | Y6  | Del  | 7094  | 13981 | 2,36 | 7095-CCCCTA-7100 <> 13981-CCCCTA-13986     |
| #14 | W50 | Dupl | 14991 | 6669  | 0,25 | 14989-CT-14990 <> 6668-CT-6669             |
| #15 | D7  | Del  | 7034  | 14400 | 0,23 | 7035-CACT-7038 <> 14400-CACT-14403         |
| #15 | D7  | Del  | 7707  | 15025 | 0,86 | 7708-CCT-7710 <> 15025-CCT-15027           |
| #15 | W50 | Del  | 7034  | 14400 | 0,07 | 7035-CACT-7038 <> 14400-CACT-14403         |
| #15 | W50 | Del  | 7707  | 15025 | 0,36 | 7708-CCT-7710 <> 15025-CCT-15027           |
| #15 | W50 | Dupl | 772   | 14969 | 1,15 | 773-T-773 <> 14969-T-14969                 |
| #15 | W50 | Dupl | 15291 | 6104  | 0,10 | 15292-CTTCAT-15297 <> 6104-CTTCAT-6109     |
| #15 | W50 | Dupl | 15503 | 7007  | 0,38 | 15501-CC-15502 <> 7006-CC-7007             |
| #15 | Y6  | Dupl | 15684 | 6657  | 0,30 | none                                       |
| #16 | W50 | Dupl | 15043 | 7017  | 1,68 | none                                       |
| #16 | W50 | Dupl | 15348 | 7144  | 0,29 | none                                       |
| #16 | D7  | Dupl | 678   | 14812 | 3,13 | 679-C-679 <> 14812-C-14812                 |
| #16 | W50 | Del  | 7747  | 14400 | 0,63 | none                                       |
| #16 | W50 | Del  | 15171 | 322   | 0,26 | 15172-GGCCACAG-15179 <> 322-GGCCACAG-329   |
| #16 | Y6  | Dupl | 15017 | 6067  | 0,18 | none                                       |
| #16 | Y6  | Dupl | 15143 | 6393  | 0,14 | 15144-T-15144 <> 6393-T-6393               |
| #17 | W50 | Del  | 6100  | 3216  | 0,28 | 6101-C-6101 <> 3216-C-3216                 |
| #17 | W50 | Del  | 6302  | 3939  | 0,08 | 6301-A-6301 <> 3939-A-3939                 |
| #17 | W50 | Del  | 7707  | 15025 | 0,13 | 7708-CCT-7710 <> 15025-CCT-15027           |
| #17 | Y6  | Dupl | 15148 | 7034  | 1,55 | 15147-G-15147 <> 7034-G-7034               |
| #18 | Y6  | Del  | 7356  | 14610 | 0,04 | 7357-TAGAAGAA-7364 <> 14610-TAGAAGAA-14617 |
| #18 | Y6  | Del  | 8940  | 14642 | 0,02 | 8941-CCCA-8944 <> 14642-CCCA-14645         |
| #18 | D7  | Dupl | 14857 | 6888  | 0,02 | 14858-GG-14859 <> 6888-GG-6889             |
| #19 | D7  | Del  | 7034  | 14400 | 0,27 | 7035-CACT-7038 <> 14400-CACT-14403         |
| #19 | W50 | Del  | 7034  | 14400 | 0,06 | 7035-CACT-7038 <> 14400-CACT-14403         |
| #19 | W50 | Del  | 7321  | 14910 | 1,60 | 7322-A-7322 <> 14910-A-14910               |
| #19 | Y6  | Dupl | 16491 | 6016  | 0,10 | 16490-T-16490 <> 6016-T-6016               |

|     |     |      |       |       |       |                                    |
|-----|-----|------|-------|-------|-------|------------------------------------|
| #20 | W50 | Del  | 7034  | 14400 | 0,43  | 7035-CACT-7038 <> 14400-CACT-14403 |
| #20 | Y6  | Del  | 7707  | 15025 | 0,19  | 7708-CCT-7710 <> 15025-CCT-15027   |
| #20 | D7  | Dupl | 14928 | 7139  | 0,10  | 14929-C-14929 <> 7139-C-7139       |
| #21 | W50 | Dupl | 14857 | 6891  | 0,04  | none                               |
| #21 | Y6  | Dupl | 15303 | 6446  | 0,25  | none                               |
| #21 | W50 | Del  | 7034  | 14400 | 0,22  | 7035-CACT-7038 <> 14400-CACT-14403 |
| #21 | Y6  | Del  | 7543  | 12688 | 0,23  | none                               |
| #21 | Y6  | Del  | 7952  | 14805 | 0,12  | 7951-C-7951 <> 14805-C-14805       |
| #22 | D7  | Dupl | 14935 | 7047  | 14,79 | 14936-TCA-14938 <> 7047-TCA-7049   |
| #22 | D7  | Dupl | 14943 | 7056  | 0,06  | none                               |
| #22 | Y6  | Dupl | 716   | 5916  | 0,10  | none                               |
| #22 | D7  | Del  | 293   | 344   | 0,26  | 294-TC-295 <> 344-TC-345           |
| #22 | D7  | Del  | 7237  | 12133 | 84,59 | none                               |
| #22 | Y6  | Del  | 7034  | 14400 | 0,18  | 7035-CACT-7038 <> 14400-CACT-14403 |
| #23 | W50 | Del  | 5810  | 3501  | 57,66 | 5811-A-5811 <> 3501-A-3501         |
| #23 | Y6  | Del  | 8269  | 12792 | 0,24  | 8270-C-8270 <> 12792-C-12792       |
| #23 | Y6  | Del  | 7034  | 14400 | 0,14  | 7035-CACT-7038 <> 14400-CACT-14403 |
| #23 | Y6  | Del  | 7040  | 13770 | 0,17  | none                               |
| #24 | D7  | Del  | 7034  | 14400 | 0,36  | 7035-CACT-7038 <> 14400-CACT-14403 |

**Table S3.** Association between health outcomes at Y6 and having a heteroplasmy rate >1% at D7 or W50.

| Health outcomes<br>at Y6                                                  | Cumulative heteroplasmy   |                            | p-value |
|---------------------------------------------------------------------------|---------------------------|----------------------------|---------|
|                                                                           | rate >1% at D7<br>or W50  | rate ≤1% at<br>D7 or W50   |         |
|                                                                           | n=12                      | n=12                       |         |
| <b>Growth</b> <i>mean ± SD</i>                                            |                           |                            |         |
| Head circumference (cm)                                                   | 50.78 ± 1.72              | 50.91 ± 1.73 <sup>†</sup>  | 0.849   |
| WAZ                                                                       | -1.08 ± 0.67              | -0.43 ± 1.19               | 0.111   |
| HAZ                                                                       | -0.77 ± 0.91              | -0.36 ± 1.15               | 0.353   |
| BMIZ                                                                      | -0.92 ± 0.79              | -0.29 ± 1.02               | 0.104   |
| <b>Clinical evaluation</b>                                                |                           |                            |         |
| Systolic blood pressure Z-score; <i>mean ± SD</i>                         | 0.46 ± 0.94               | 0.38 ± 1.15                | 0.840   |
| Clinical abnormalities; <i>n (%)</i>                                      | 1 (8.33)                  | 3 (25.0)                   | 0.590   |
| Hospitalised since PROMISE PEP; <i>n (%)</i>                              | 3 (25.0)                  | 2 (16.67)                  | 1.000   |
| Abnormal LDH concentration; <i>n (%)</i>                                  | 9 (75.0)                  | 8 (66.67)                  | 1.000   |
| Abnormal ALT concentration; <i>n (%)</i>                                  | 0 (0.0)                   | 0 (0.0)                    | N.A.    |
| <b>Developmental outcomes</b>                                             |                           |                            |         |
| At least one disability detected from the<br>10questionPlus; <i>n (%)</i> | 4 (33.33)                 | 3 (25.0)                   | 1.000   |
| SDQ-25; <i>mean ± SD</i>                                                  | 8.75 ± 3.96               | 6.67 ± 4.91                | 0.265   |
| TOVA; <i>mean ± SD</i>                                                    | 2.09 ± 0.58               | 2.38 ± 0.77 <sup>†</sup>   | 0.321   |
| MABC-2; <i>mean ± SD</i>                                                  | 74.64 ± 8.92 <sup>†</sup> | 76.55 ± 10.54 <sup>†</sup> | 0.652   |

KABC-II; *mean ± SD* 52.91 ± 16.81<sup>†</sup> 61.91 ± 8.61<sup>†</sup> 0.130

<sup>†</sup>one missing value. Abbreviations: SD, standard deviation; WAZ, weight-for-age Z-score; HAZ, height-for-age Z-score; BMIZ, paediatric body mass index Z-score; LDH, Lactate dehydrogenase; ALT, alanine transaminase; SDQ-25, Strengths and Difficulties Questionnaire; TOVA, Test of Variable of Attention; MABC-2, Movement Assessment Battery for Children second edition; KABC-II, Kaufman Assessment Battery for Children second edition.

**Supplementary Table S4:** Association between mother's viral load at birth (<1000 versus ≥1000 cp/ml) and poor health outcomes at Y6, stratified by heteroplasmy rate (>1% or ≤1%) at D7

| Health outcomes<br>at Y6        | Linear regression coefficient (β) or Relative Risk (RR)<br>and 95%CI for mother’s viral load at birth,<br>by cumulative heteroplasmy rate |                                  | p-value for<br>interaction |
|---------------------------------|-------------------------------------------------------------------------------------------------------------------------------------------|----------------------------------|----------------------------|
|                                 | > 1% at D7                                                                                                                                | ≤ 1% at D7                       |                            |
|                                 | n=7                                                                                                                                       | n=17                             |                            |
| Growth                          |                                                                                                                                           |                                  |                            |
| Head circumference (cm)         | 0.11 [-3.55 – 3.78]                                                                                                                       | 0.09 [-1.86 – 2.04] <sup>†</sup> | 0.990                      |
| WAZ                             | 0.56 [-0.74 – 1.86]                                                                                                                       | -0.50 [-1.50 – 0.51]             | 0.250                      |
| HAZ                             | 1.28 [-0.07 -2.62]                                                                                                                        | 0.06 [-0.99 – 1.11]              | 0.206                      |
| BMIZ                            | -0.55 [-2.48 – 1.37]                                                                                                                      | -0.85 [-1.75 – 0.05]             | 0.713                      |
| Clinical evaluation             |                                                                                                                                           |                                  |                            |
| Systolic blood pressure Z-score | 1.18 [-0.34 – 2.70]                                                                                                                       | 0.10 [-0.96 – 1.17]              | 0.266                      |
| LDH concentration               | 6.17 [-354.68 – 367.01]                                                                                                                   | -172.23 [-598.51 – 253.51]       | 0.640                      |
| ALT concentration               | -8.17 [-31.01 – 14.68]                                                                                                                    | 1.36 [-6.65 – 9.37]              | 0.194                      |

<sup>†</sup>one missing value. Abbreviations: SD, standard deviation; WAZ, weight-for-age Z-score; HAZ, height-for-age Z-score; BMIZ, paediatric body mass index Z-score; LDH, Lactate dehydrogenase; ALT, alanine transaminase.

**Table S5.** Association between infant WHZ at D7 and poor health outcomes at Y6, stratified by heteroplasmy rate (>1% or ≤1%) at D7.

| Health outcomes<br>at Y6        | Linear regression coefficient (β) or Relative Risk<br>(RR) and 95%CI for mother's age at birth,<br>by cumulative heteroplasmy rate |                                  | p-value for<br>interaction |
|---------------------------------|------------------------------------------------------------------------------------------------------------------------------------|----------------------------------|----------------------------|
|                                 | > 1% at D7                                                                                                                         | ≤ 1% at D7                       |                            |
|                                 | n=7                                                                                                                                | n=17                             |                            |
| Growth                          |                                                                                                                                    |                                  |                            |
| Head circumference (cm)         | 0.60 [-0.58 – 1.77]                                                                                                                | 0.32 [-0.26 – 0.90] <sup>†</sup> | 0.647                      |
| WAZ                             | 0.08 [-0.38 – 0.55]                                                                                                                | -0.11 [-0.46 – 0.24]             | 0.596                      |
| HAZ                             | -0.33 [-1.07 – 0.40]                                                                                                               | -0.14 [-0.50 – 0.23]             | 0.613                      |
| BMIZ                            | 0.49 [-0.27 – 1.24]                                                                                                                | -0.02 [-0.35 – 0.31]             | 0.153                      |
| Clinical evaluation             |                                                                                                                                    |                                  |                            |
| Systolic blood pressure Z-score | -0.44 [-1.19 – 0.31]                                                                                                               | -0.10 [-0.47 – 0.27]             | 0.388                      |
| LDH concentration               | 29.33 [-151.13 – 209.78]                                                                                                           | 157.78 [25.38 – 290.18]          | 0.361                      |
| ALT concentration               | -1.39 [-10.34 – 7.56]                                                                                                              | -1.14 [-3.56 – 1.28]             | 0.922                      |

<sup>†</sup>one missing value. Abbreviations: SD, standard deviation; WAZ, weight-for-age Z-score; HAZ, height-for-age Z-score; BMIZ, paediatric body mass index Z-score; LDH, Lactate dehydrogenase; ALT, alanine transaminase.

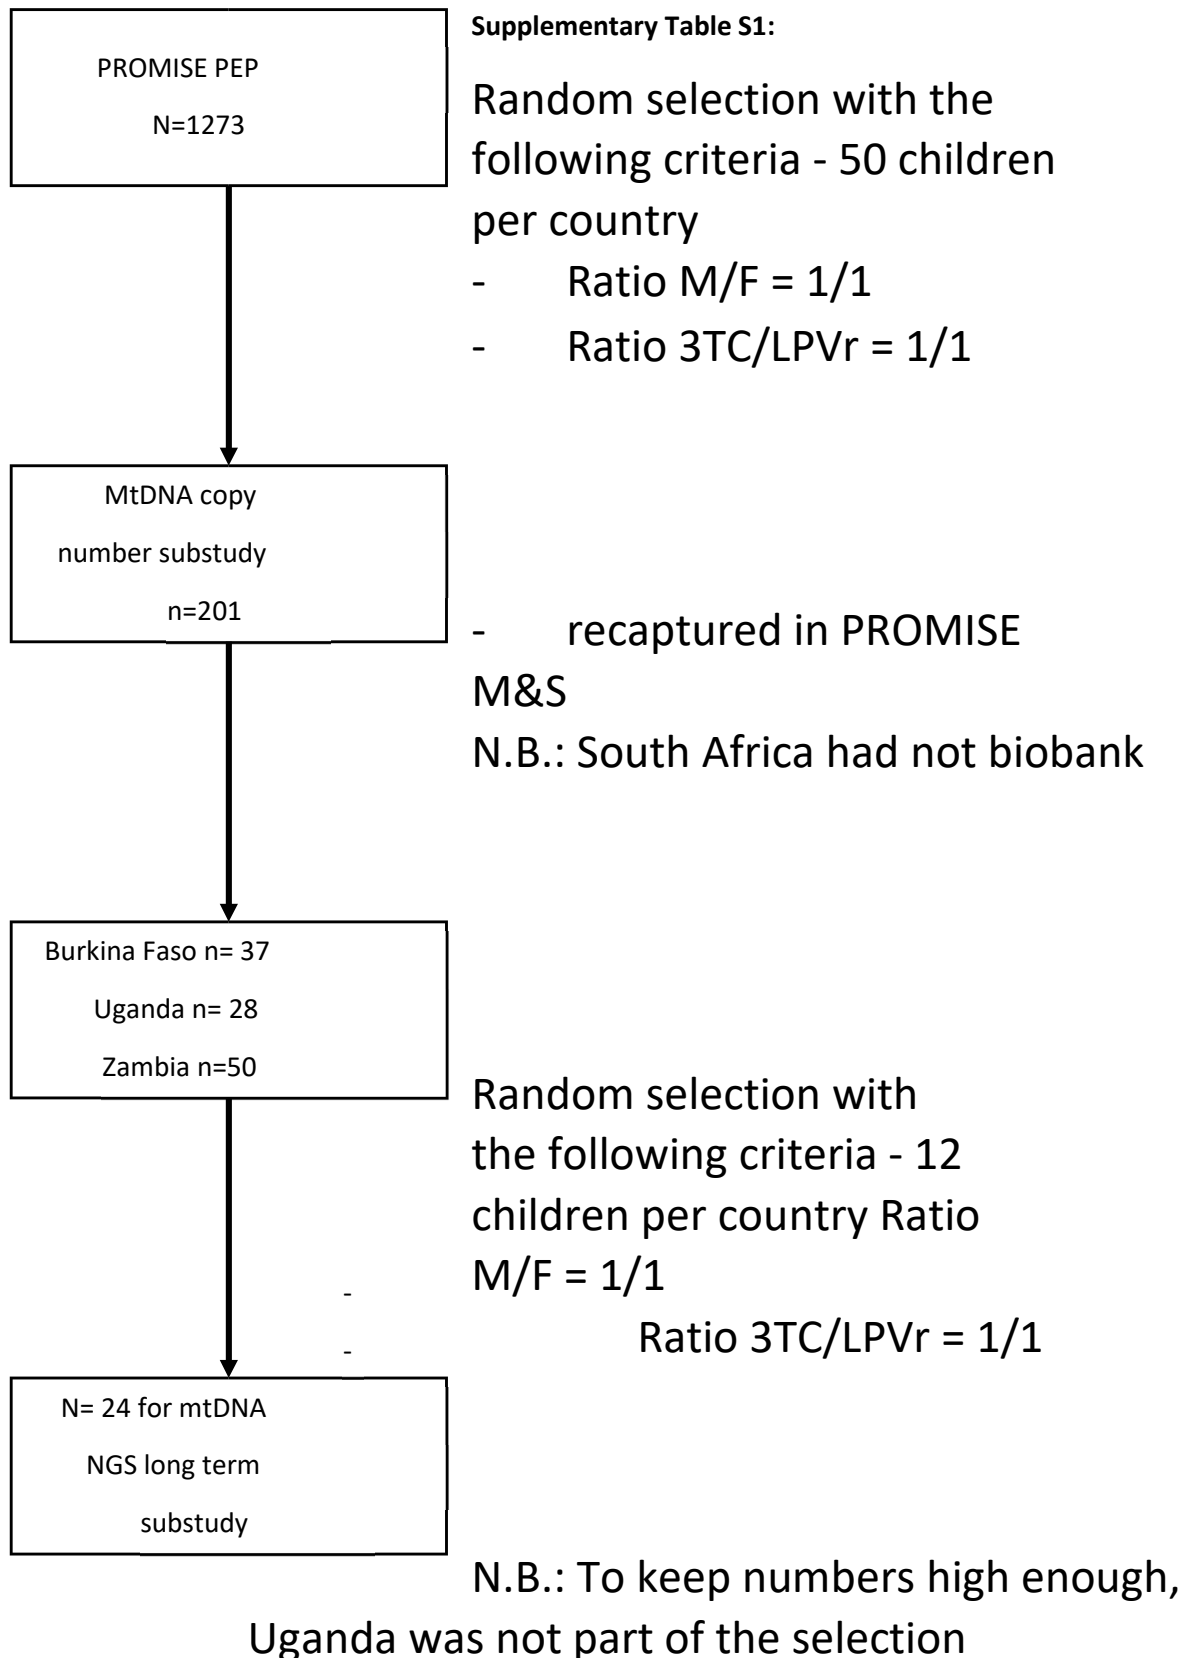

**Figure S1.** Sample selection flow chart. Out of the children enrolled in the RPOMISE-PEP trial in 2009-2012, 201 were randomly selected for a first substudy on mitochondrial parameters among HEU (Monnin et al., 2019). Out of these 201, 115 were recaptured during the PROMISE-M&S trial conducted in 2017-2018.
